# Supplementary material
Source: publisher figshare collection journal article supplement (https://acs.figshare.com/ndownloader/files/5825358)
Supplement: Supplementary file 1 [file 5825358]

Solvent-Free Atom Transfer Radical Polymerization in the Synthesis of Fe<sub>2</sub>O<sub>3</sub>@Polystyrene Core-Shell Nanoparticles

*Yong Wang,<sup>†</sup> Xiaowei Teng,<sup>†</sup> Jin-Shan Wang<sup>‡</sup>, and Hong Yang<sup>\*,†,§</sup>*

Department of Chemical Engineering and Laboratory for Laser Energetics, University of Rochester,  
Rochester, NY 14627, USA

R& D, Eastman Kodak Company, 1999 Lake Avenue, Rochester, NY 14650

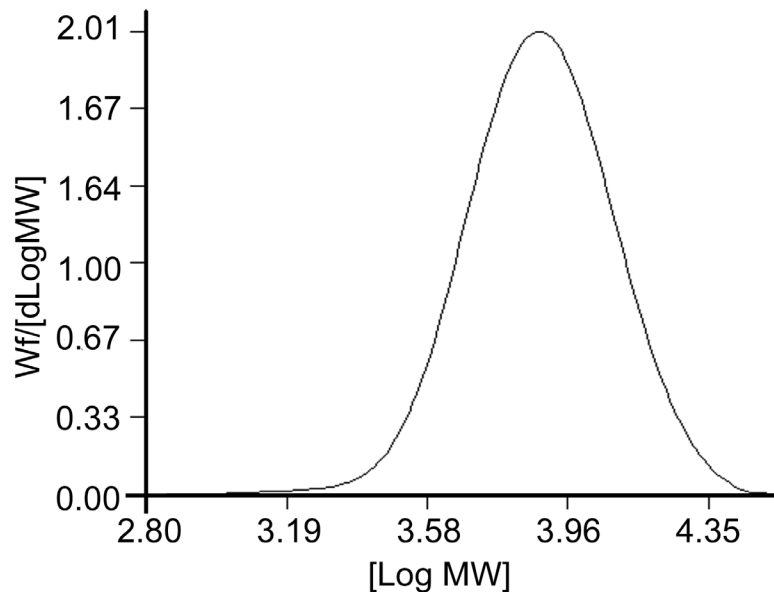

**Figure S1.** Molecular weight distribution of polystyrene from Fe<sub>2</sub>O<sub>3</sub>@polystyrene core-shell nanoparticles. The GPC data was based on light scattering measurements.

---

<sup>†</sup> Department of Chemical Engineering, University of Rochester

<sup>‡</sup> Eastman Kodak Company

<sup>§</sup> Laboratory for Laser Energetics (LLE), University of Rochester
